# Supplementary material for: The Effectiveness of a Foundation Year 1 Doctor Preparation Course for Final Year Medical Students
Source: PubMed Central journal article supplement (PMC7797572; doi:10.1177/2382120520984184), 2021-01-07
Supplement: sj-pdf-1-mde-10.1177_2382120520984184.pdf [file sj-pdf-1-mde-10.1177_2382120520984184.pdf]

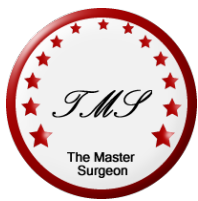

## Preparation 2 Practice Course – Course Programme

March 2015

Partnership Learning Centre, Good Hope Hospital

| DAY 1         |                                                                                   |                                    |                            |                            |
|---------------|-----------------------------------------------------------------------------------|------------------------------------|----------------------------|----------------------------|
| 8.30 – 8.45   | Registration, Coffee and Biscuits                                                 |                                    |                            |                            |
| 8.45 - 9.00   | Welcome and Introductions                                                         |                                    |                            |                            |
| 9.00 – 9.15   | Introductory lecture<br>- Learning objectives, Content, Structure of the two days |                                    |                            |                            |
| 9:15 – 10:00  | The UK Foundation Programme – portfolio, WBAs, CV tips, The next step, courses    |                                    |                            |                            |
| 10:00 – 10:45 | Lecture - Acute coronary syndrome and management                                  |                                    |                            |                            |
| 10:45 – 11:15 | Team A – Px for ACS + LVF                                                         | Team B – Px for ACS + LVF          | Team C – Px for ACS + LVF  | Team D – Px for ACS + LVF  |
| 11:15 – 11:45 | Coffee and Biscuits                                                               |                                    |                            |                            |
| 11:45 – 12:15 | Lecture – AF and common tachyarrhythmias                                          |                                    |                            |                            |
| 12:15 – 12:45 | Team A – Px for AF/Arrhythmias                                                    | Team B – Px for AF/Arrhythmias     | Team C – Px AF/Arrhythmias | Team D – Px AF/Arrhythmias |
| 12:45 - 13:30 | Lunch                                                                             |                                    |                            |                            |
| 13:30 – 14:15 | Lecture – Approach to the septic patient                                          |                                    |                            |                            |
| 14:15 – 15:00 | Lecture – Approach to venous thromboembolism                                      |                                    |                            |                            |
| 15:00 – 15:15 | Coffee and Biscuits                                                               |                                    |                            |                            |
| 15:00 – 17:15 | Small Group Sessions (What they don't teach you)                                  |                                    |                            |                            |
|               | How to confirm death and death certificates                                       | How to assess a patient after fall | Documentation              | GI Bleed                   |
| 15:15 – 15:40 | Team A                                                                            | Team B                             | Team C                     | Team D                     |
| 15:40 – 16:05 | Team D                                                                            | Team A                             | Team B                     | Team C                     |
| 16:05 – 16:30 | Team C                                                                            | Team D                             | Team A                     | Team B                     |
| 16:30 – 16:55 | Team B                                                                            | Team C                             | Team D                     | Team D                     |
| :00 – 17:30   | End of Day and Fun Quiz using Turning Point                                       |                                    |                            |                            |

| DAY 2         |                                                                         |                           |                         |                               |
|---------------|-------------------------------------------------------------------------|---------------------------|-------------------------|-------------------------------|
| 8.30 – 8.45   | Coffee                                                                  |                           |                         |                               |
| 8.45 - 9.00   | Introduction to day 2                                                   |                           |                         |                               |
| 9.00 – 9.45   | Lecture – Approach to oliguric patient and managing acute renal failure |                           |                         |                               |
| 9:45 – 10:00  | Coffee and Biscuits                                                     |                           |                         |                               |
| 10:00 – 12:00 | Small Group Sessions (Prescribing)                                      |                           |                         |                               |
|               | Fluid management lecture                                                | Prescribing Fluids        | Prescribing sedation    | Anticoagulation               |
| 10:00 – 10:25 | Team A                                                                  | Team B                    | Team C                  | Team D                        |
| 10:25 – 10:50 | Team D                                                                  | Team A                    | Team B                  | Team C                        |
| 10:50 – 11:15 | Team C                                                                  | Team D                    | Team A                  | Team B                        |
| 11:15 – 11:40 | Team B                                                                  | Team C                    | Team D                  | Team D                        |
| 12:00 – 13:00 | Lunch                                                                   |                           |                         |                               |
| 13:00 – 15:00 | Small Group Sessions (Survival Guide)                                   |                           |                         |                               |
|               | Radiology Revision                                                      | On-calls and night shifts | Handovers and Referrals | Abnormal blood results / ABGs |
| 13:00 – 13:25 | Team A                                                                  | Team B                    | Team C                  | Team D                        |
| 13:25 – 13:50 | Team D                                                                  | Team A                    | Team B                  | Team C                        |
| 13:50 – 14:15 | Team C                                                                  | Team D                    | Team A                  | Team B                        |
| 14:15 – 14:40 | Team B                                                                  | Team C                    | Team D                  | Team D                        |
| 15:00 – 15:15 | Coffee and Biscuits                                                     |                           |                         |                               |
| 15:15 – 16:00 | Lecture – Abnormal electrolytes                                         |                           |                         |                               |
| 16:00 – 16:45 | Lecture – Approach to the patient in shock                              |                           |                         |                               |
| 16:45 – 17:00 | Conclusion, Feedback, Return of cheques                                 |                           |                         |                               |

**Appendix 1:** Course programme.
